# Supplementary material for: Widespread RNA binding by chromatin-associated proteins
Source: PubMed Central journal article supplement (PMC4756407; doi:10.1186/s13059-016-0878-3), 2016-02-16
Supplement: 13059_2016_878_MOESM1_ESM.pdf [file 13059_2016_878_MOESM1_ESM.pdf]

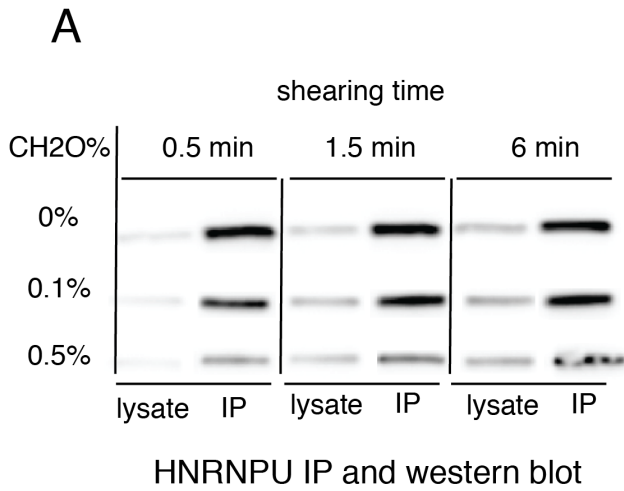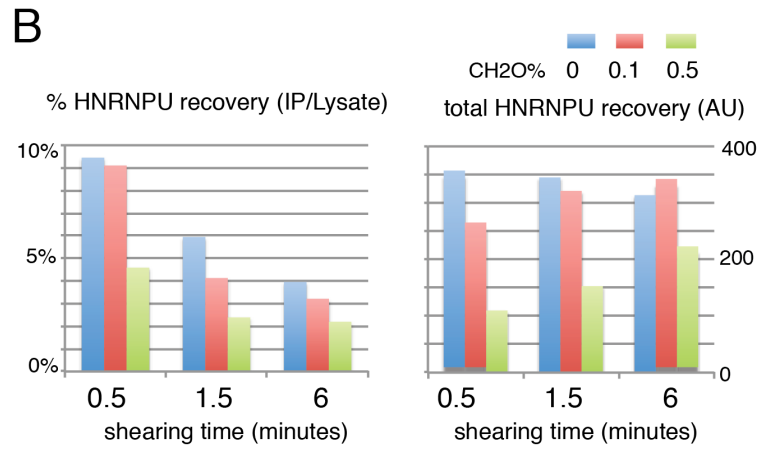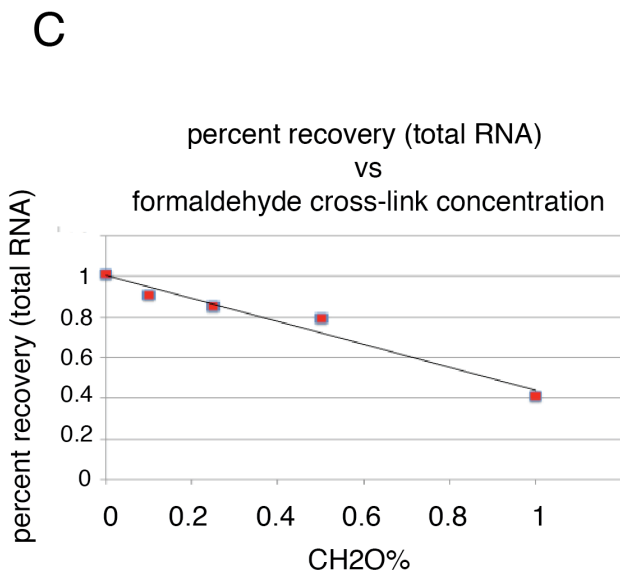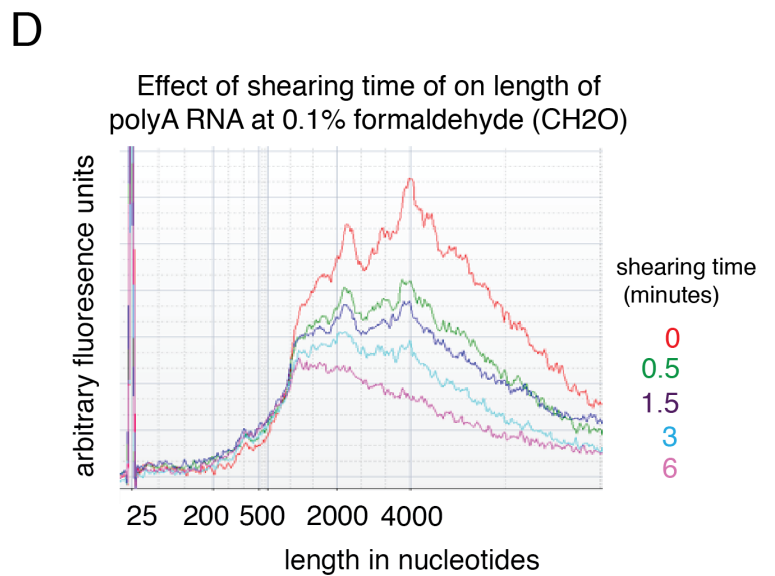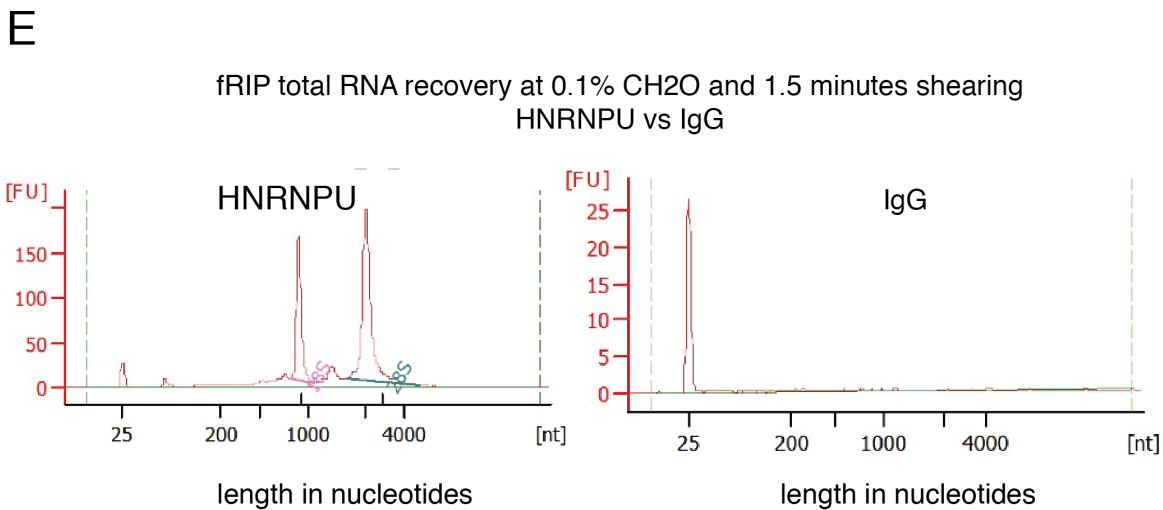

### **Figure S1: fRIP-Seq optimization**

We tested the efficiency and integrity of HNRNPU and RNA recovery respectively over a range of the two immunoprecipitation conditions, formaldehyde concentration (cross-linking), and sonication (shearing). (A) Higher amounts of HNRNPU were recovered in native (0%) and lower formaldehyde concentrations (0.1%) in both lysate and immunoprecipitation reactions than with 0.5% formaldehyde. (B) Longer sonication times mitigated higher formaldehyde concentrations and increased yield, as quantified using densitometry to calculate relative and total yield. (C) Total RNA recovery was less efficient with increasing formaldehyde concentration. (D) Longer sonication resulted in smaller sized polyA selected RNA at 0.1% formaldehyde. (E) Total RNA recovery associated with HNRNPU compared to total RNA recovery associated with the IgG negative control.

A

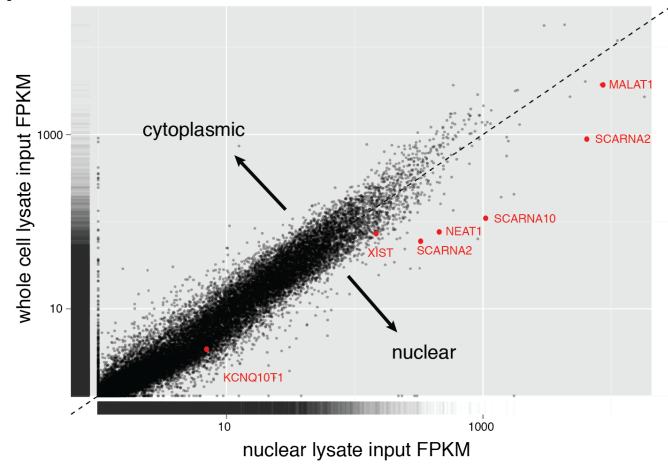

B

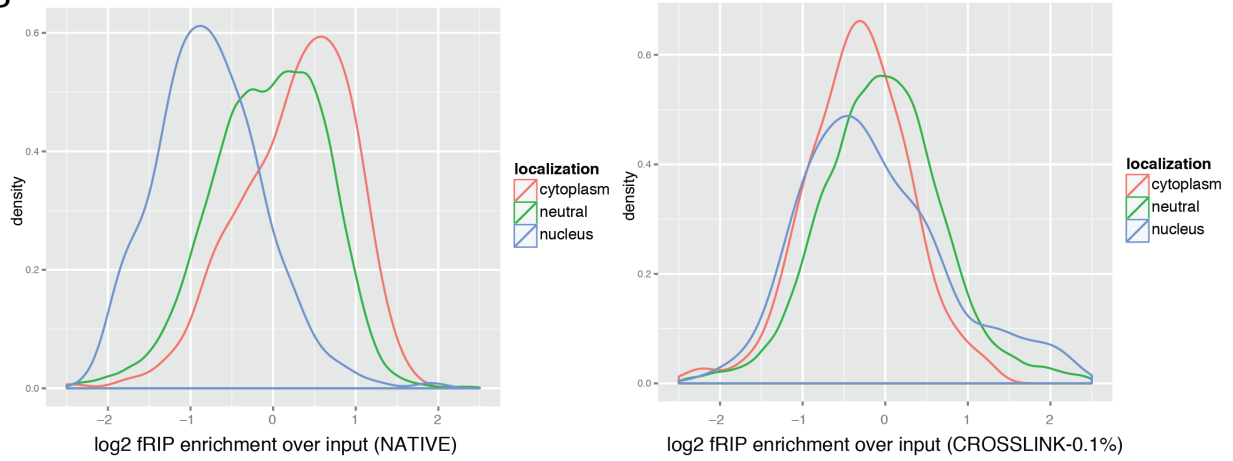

C

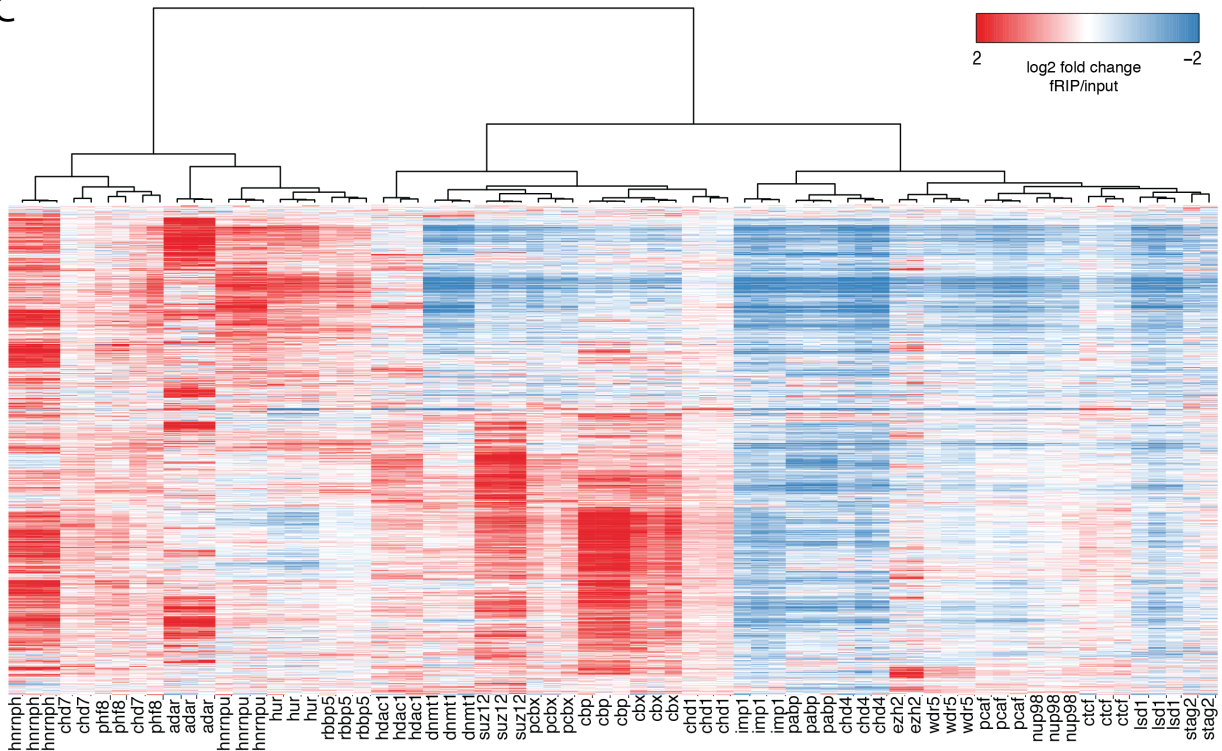

**Figure S2: The effect of transcript localization on reassociation and fRIP-Seq enrichment**

(A) Scatter plot of abundance (FPKM) generated by RNA-Seq from nuclear lysate (x-axis) versus whole cell lysate (y-axis) in K562 cells. Several canonical nuclear-localized transcripts are highlighted in red. (B) Density (y-axis) plots of HNRNPU log<sub>2</sub> fold enrichment over input for nuclear (blue), neutral (green), and cytoplasmic (red) transcripts under native RIP (left) versus fRIP 0.1% formaldehyde crosslinking conditions (right). Under native conditions we observed higher enrichment of cytoplasmically-localized transcripts than under cross-linked conditions, suggesting that the fRIP conditions reduce re-association and post-lysis mixing. (C) Heat map and hierarchical clustering of log<sub>2</sub> fold fRIP enrichment over whole cell input for the 1300 genes enriched in the nucleus with a p-value of < 0.01. Depletion of these transcripts from fRIP-Seq for cytosolic proteins is evident for IMP1 and PABP. Likewise, fRIP-Seq of the predominantly nuclear HNRNPH reveals enrichment for these transcripts as a whole. However, most proteins and CAPs we surveyed with fRIP-Seq do not enrich or deplete for transcripts as a function of their localization, suggesting that the nuclear localization of CAPs is not the primary contributing factor to the transcripts we observed as being enriched or depleted.

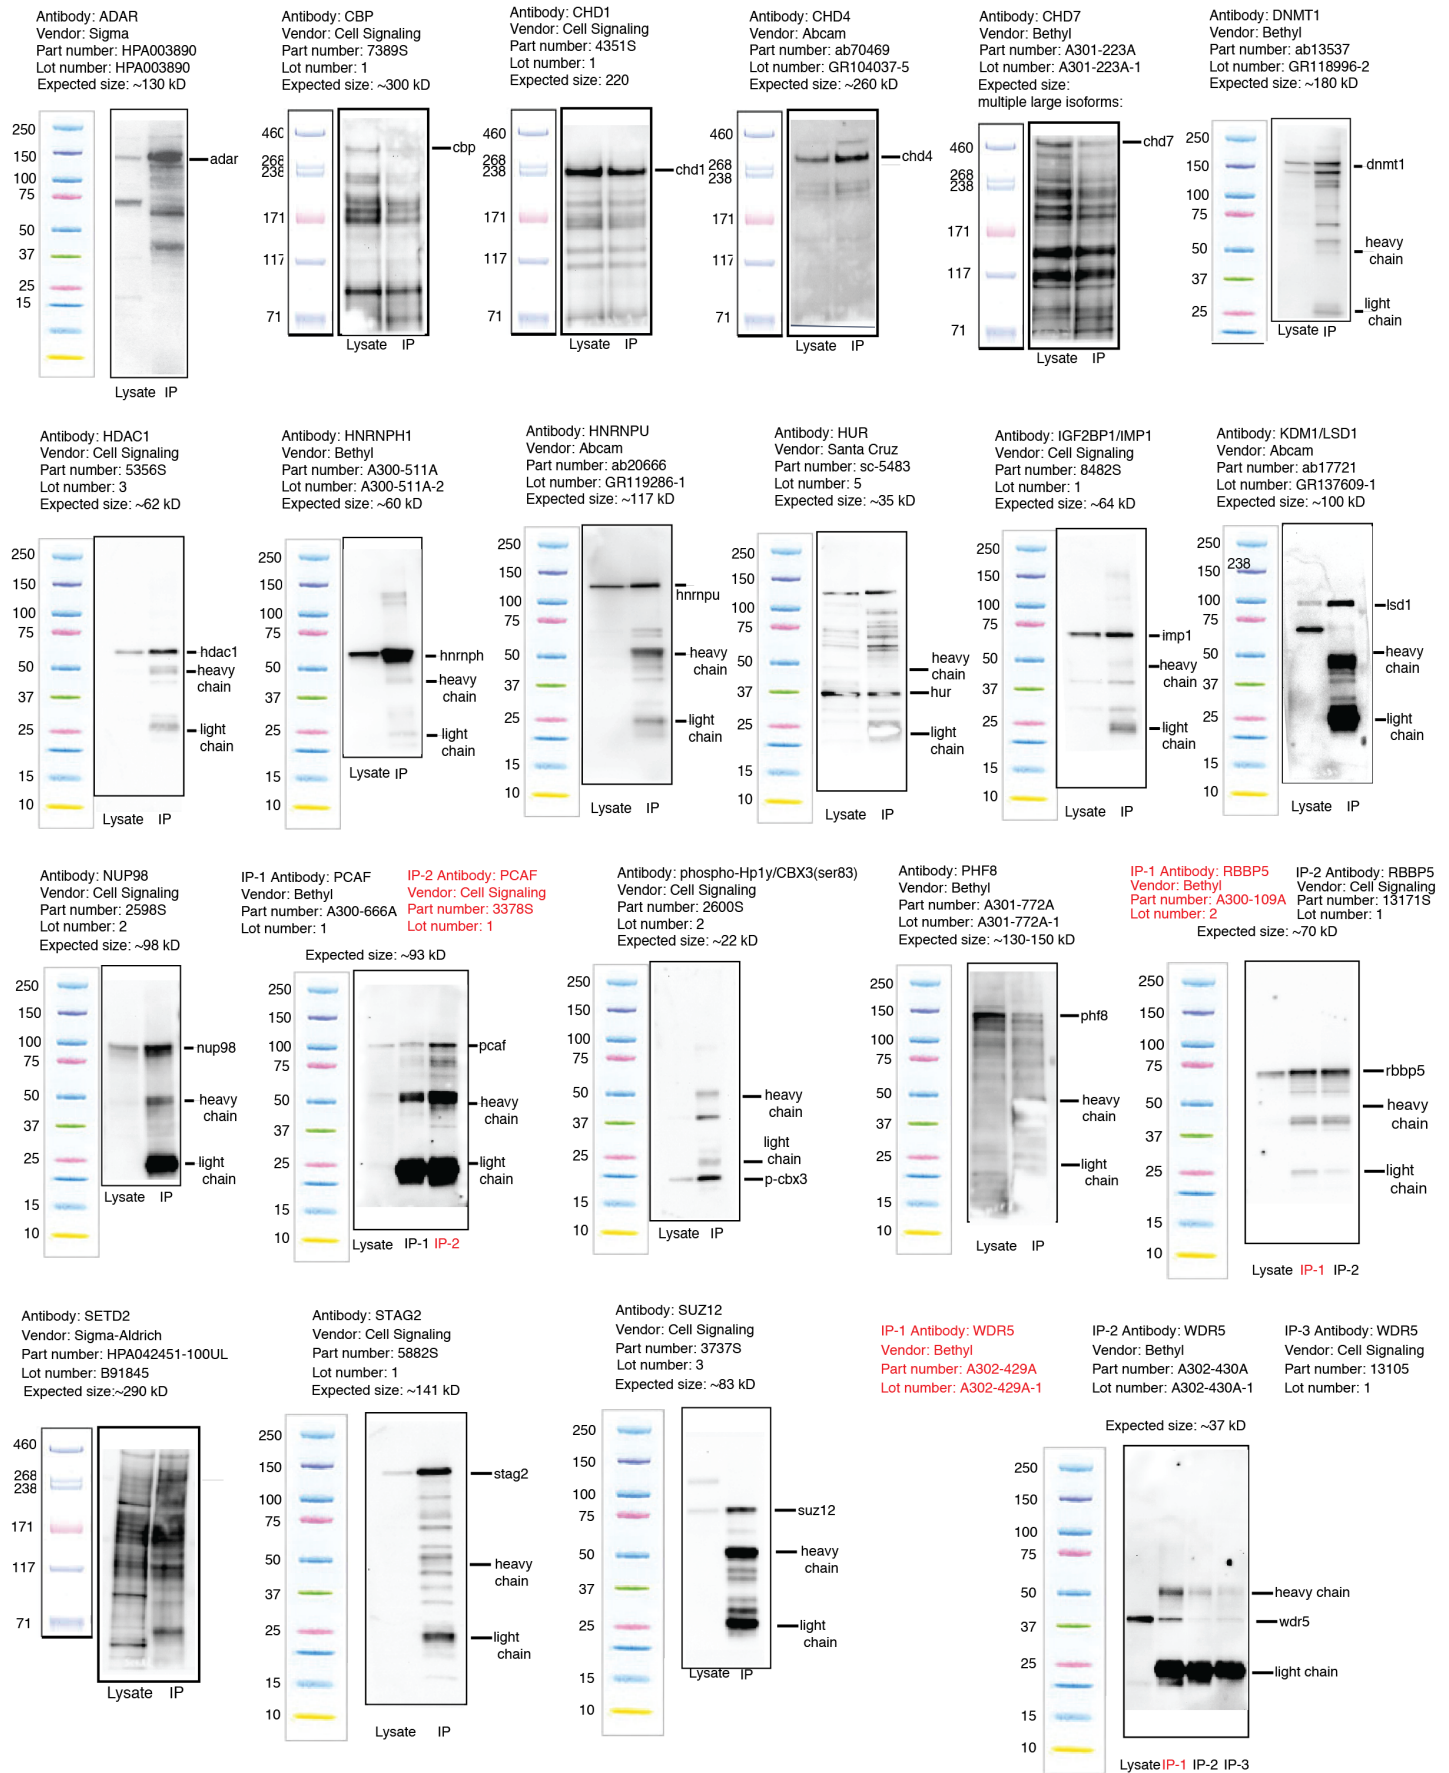

**Figure S3: Validation of fRIP-Seq antibodies by western blot.**

For antibodies not previously validated by ENCODE, we performed “mini” fRIP experiments using 1/10 volume of lysate and antibody. We separated using SDS-PAGE and western blotted for the target fRIP protein. We ran each mini fRIP alongside 10 micrograms of whole cell lysate. In each panel, we noted the expected size alongside the specific band(s), as well as bands running at the expected size for IgG heavy and light chains. Some of the antibodies for larger molecular weight proteins recognize multiple large isoforms and/or smaller degradation product bands. For several proteins, we tested multiple antibodies and note the final antibody used in red text. SETD2 is an example of a rejected antibody that did not recognize a distinct band at the expected size and recognized thousands of other bands.

**A****NICN1**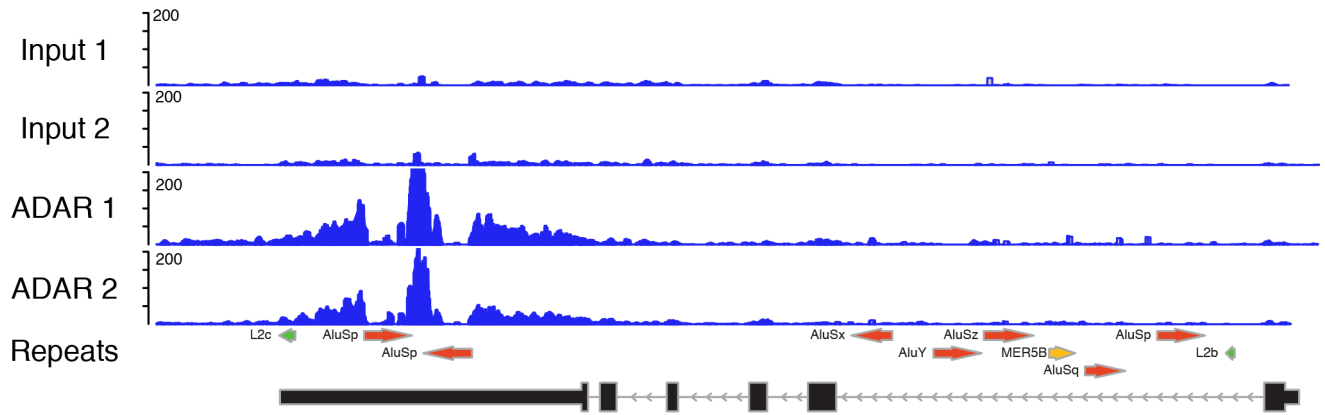**B****RAD23A**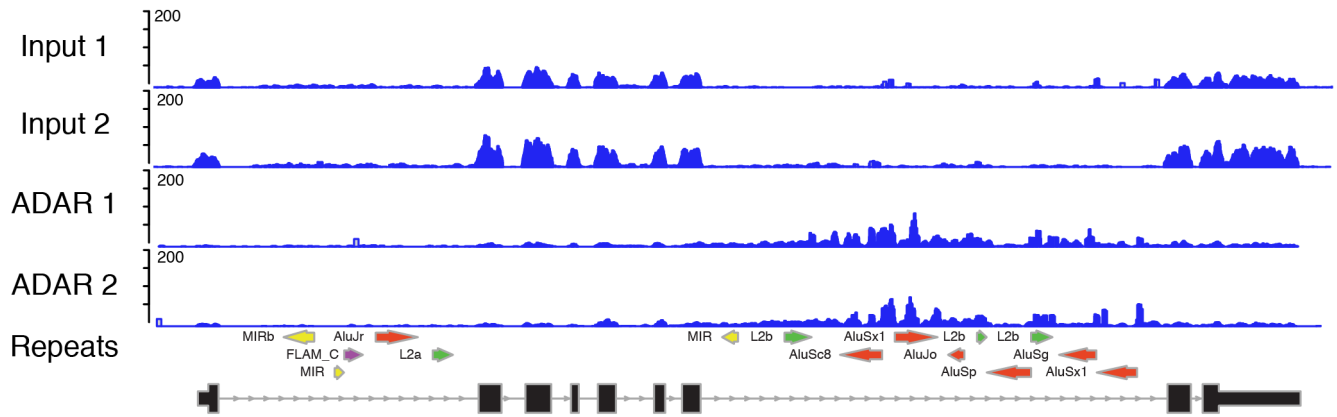**C**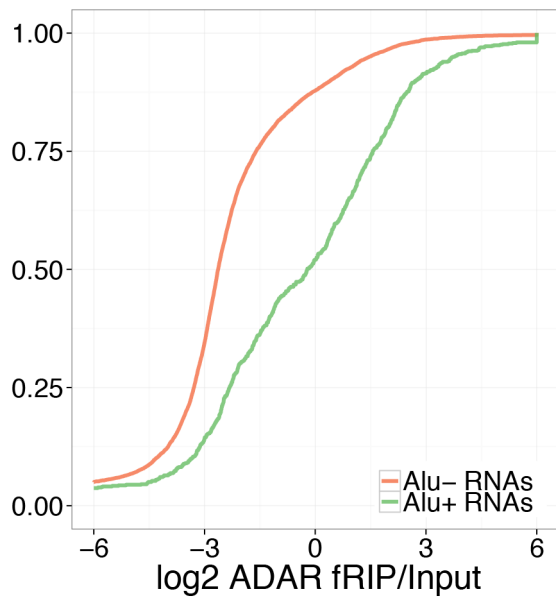**D**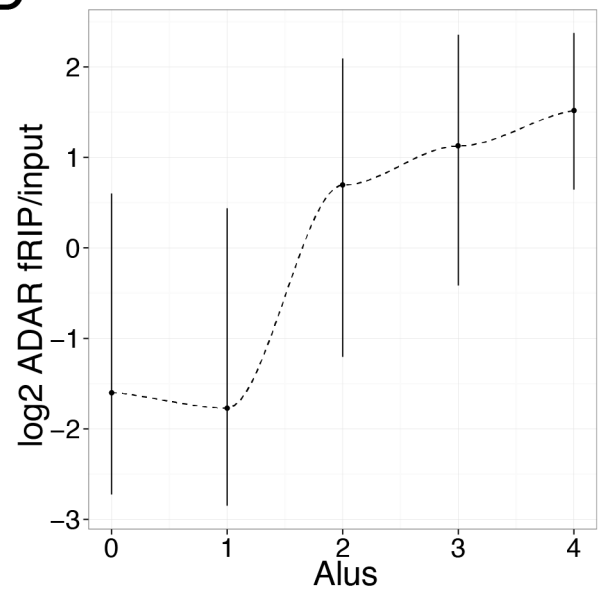

**Figure S4: ADAR preferentially binds to Alu elements and adjacent regions.**

We plotted examples of ADAR association with Alu repeats captured with fRIP-Seq. For each gene, we display input RNA-Seq coverage above ADAR fRIP-Seq coverage. Annotation tracks for RepeatMasker SINE elements (Alu instances are in red) and GENCODE transcript models are below the coverage tracks. ADAR binds Alu elements in (A) NICN1 and (B) RAD23A. (C) Genome-wide, genes containing Alu elements have greater fRIP/input fold changes than genes without them, shown here as the empirical cumulative distribution functions of each class. (D) Genes containing more Alu elements have greater fold changes, shown as the 25th, 50th, and 75th percentile of the fRIP/input fold change distribution for each Alu count.



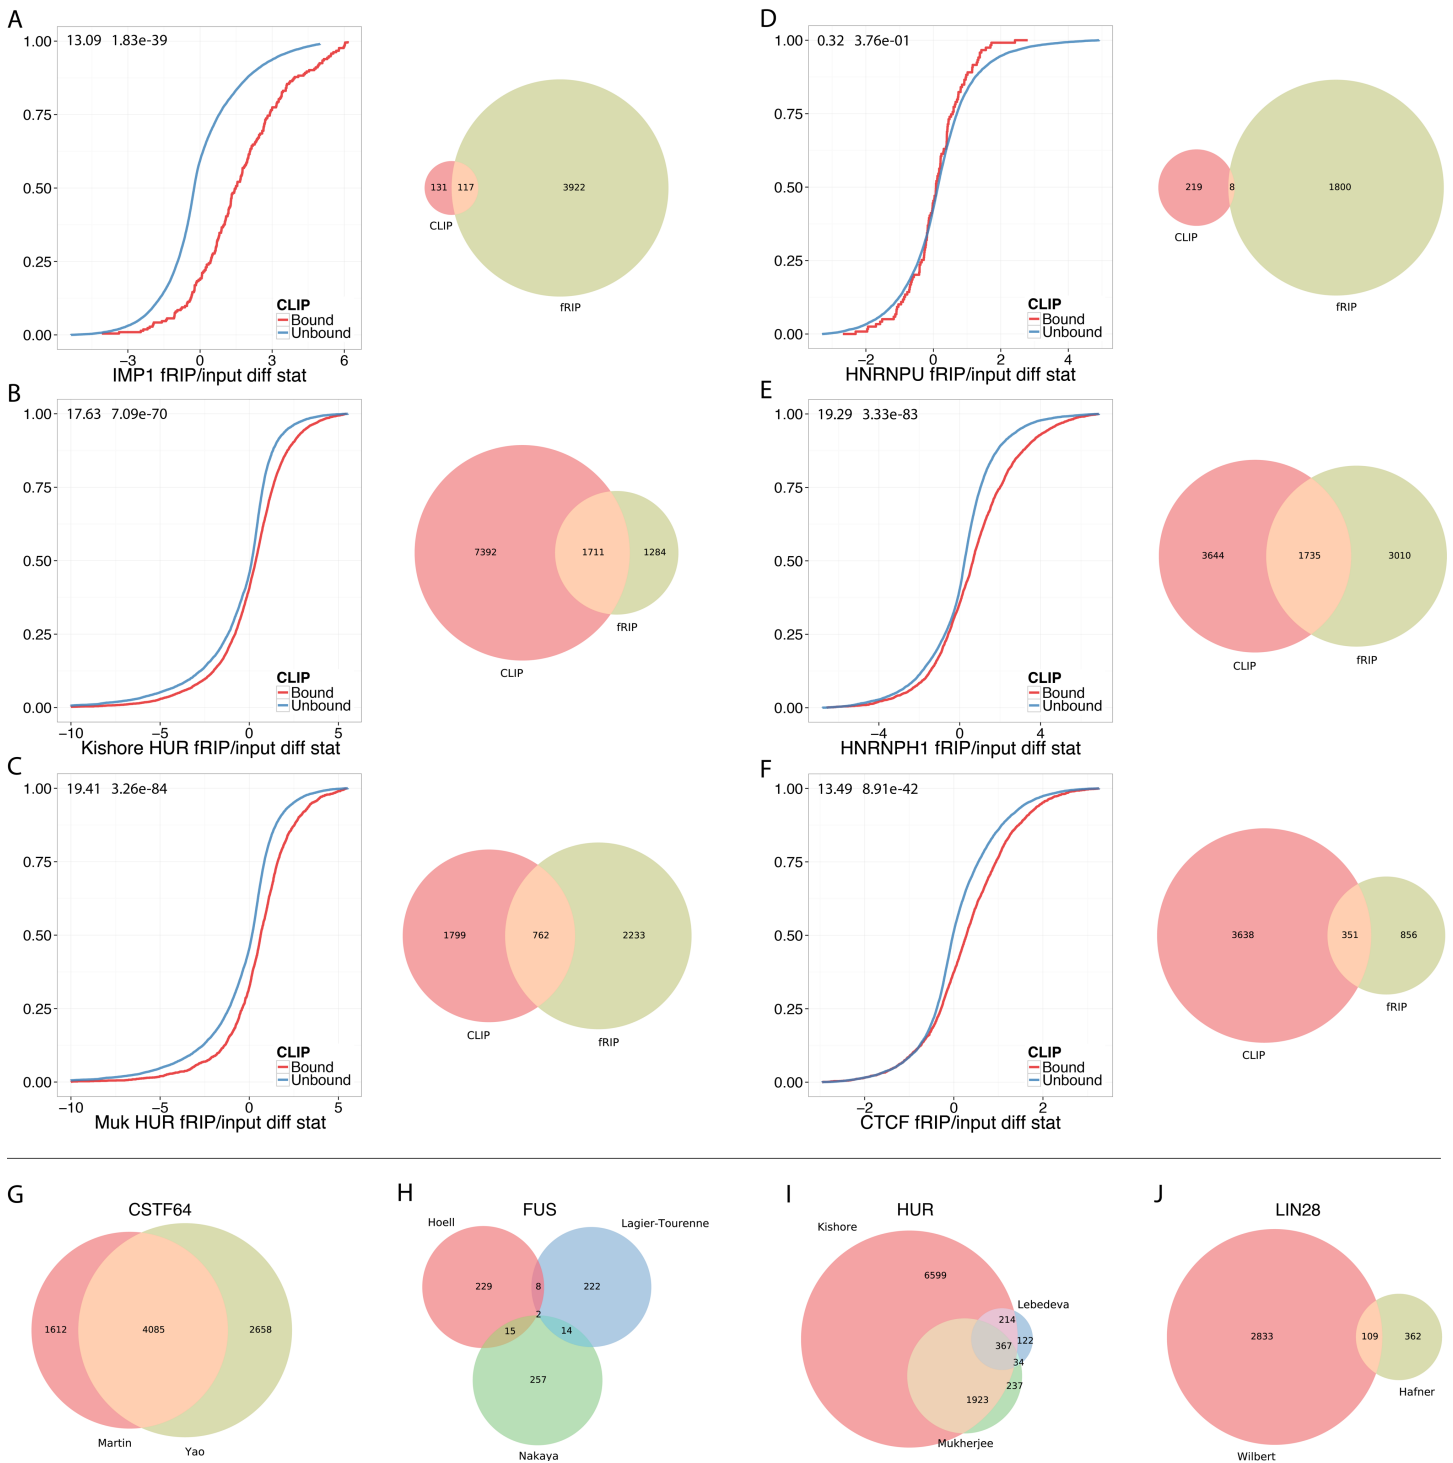

### Figure S5: fRIP-Seq broadly agrees with CLIP-Seq.

We compared Cuffdiff differential expression test statistics for CLIP-Seq bound genes to all unbound genes. For CTCF, HNRNPH1, IMP1 and two versions of HUR, CLIP-Seq bound RNAs had significantly greater difference statistics than unbound RNAs ( $p$ -values  $< 1e-37$ ), shown as the empirical cumulative distribution functions of the statistic for each set. This enrichment was apparent despite all CLIP-Seq experiments having been performed in different cell types (HEK293 for IMP1, HUR, and HNRNPH1; HeLa for HNRNPU; U2OS for CTCF).

Mann-Whitney U test Z-scores and p-values are specified in the upper left corners. The difference was insignificant for HNRNPU, for which only 227 targeted genes could be discerned from the CLIP-Seq data, of which only 138 were expressed in our K562 cells. Venn diagrams compare and contrast the CLIP-Seq bound RNAs with significantly bound RNAs identified by fRIP-Seq. The bottom row depicts analogous Venn diagram comparisons for CLIP-Seq performed on the same protein in different projects (labeled by manuscript first author), demonstrating that the fRIP/CLIP overlaps are within the bounds of CLIP/CLIP overlaps.

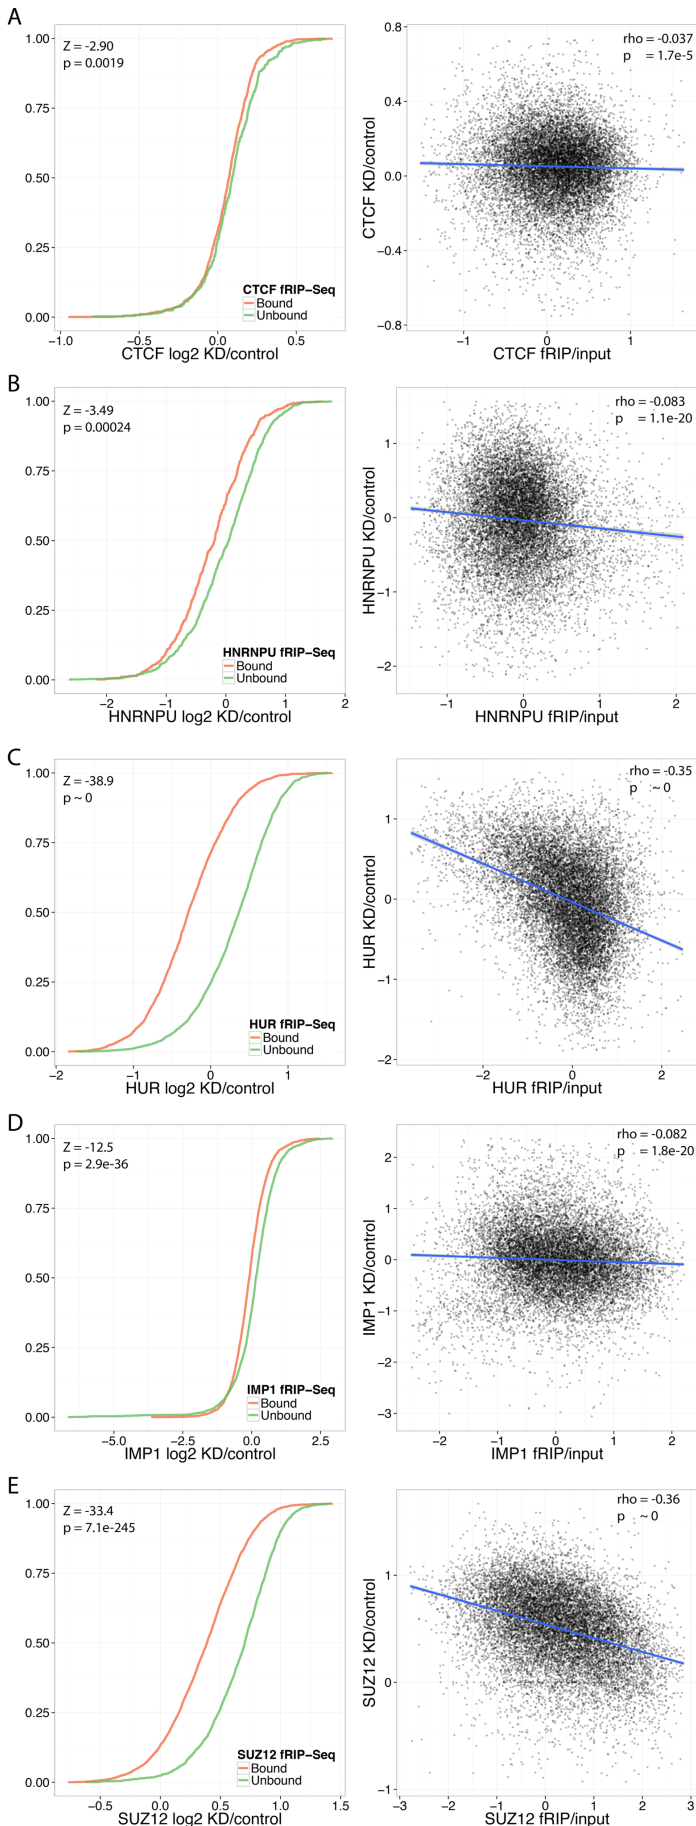

## Figure S6: fRIP-Seq

targeted transcripts are affected by protein depletion.

We downloaded and analyzed publicly available RNA-Seq measuring gene expression after depletion of five of our proteins. In the left column of plots, we classified all genes as significantly bound or unbound by fRIP-Seq and plotted the empirical cumulative distribution function of log<sub>2</sub> knockdown/control fold changes for each set. Mann-Whitney U tests confirmed that the abundance of bound genes was significantly altered for each protein. In the right column, we plotted fold changes between the two experiments for all genes. Spearman correlations indicate a significant relationship between the two in every case.

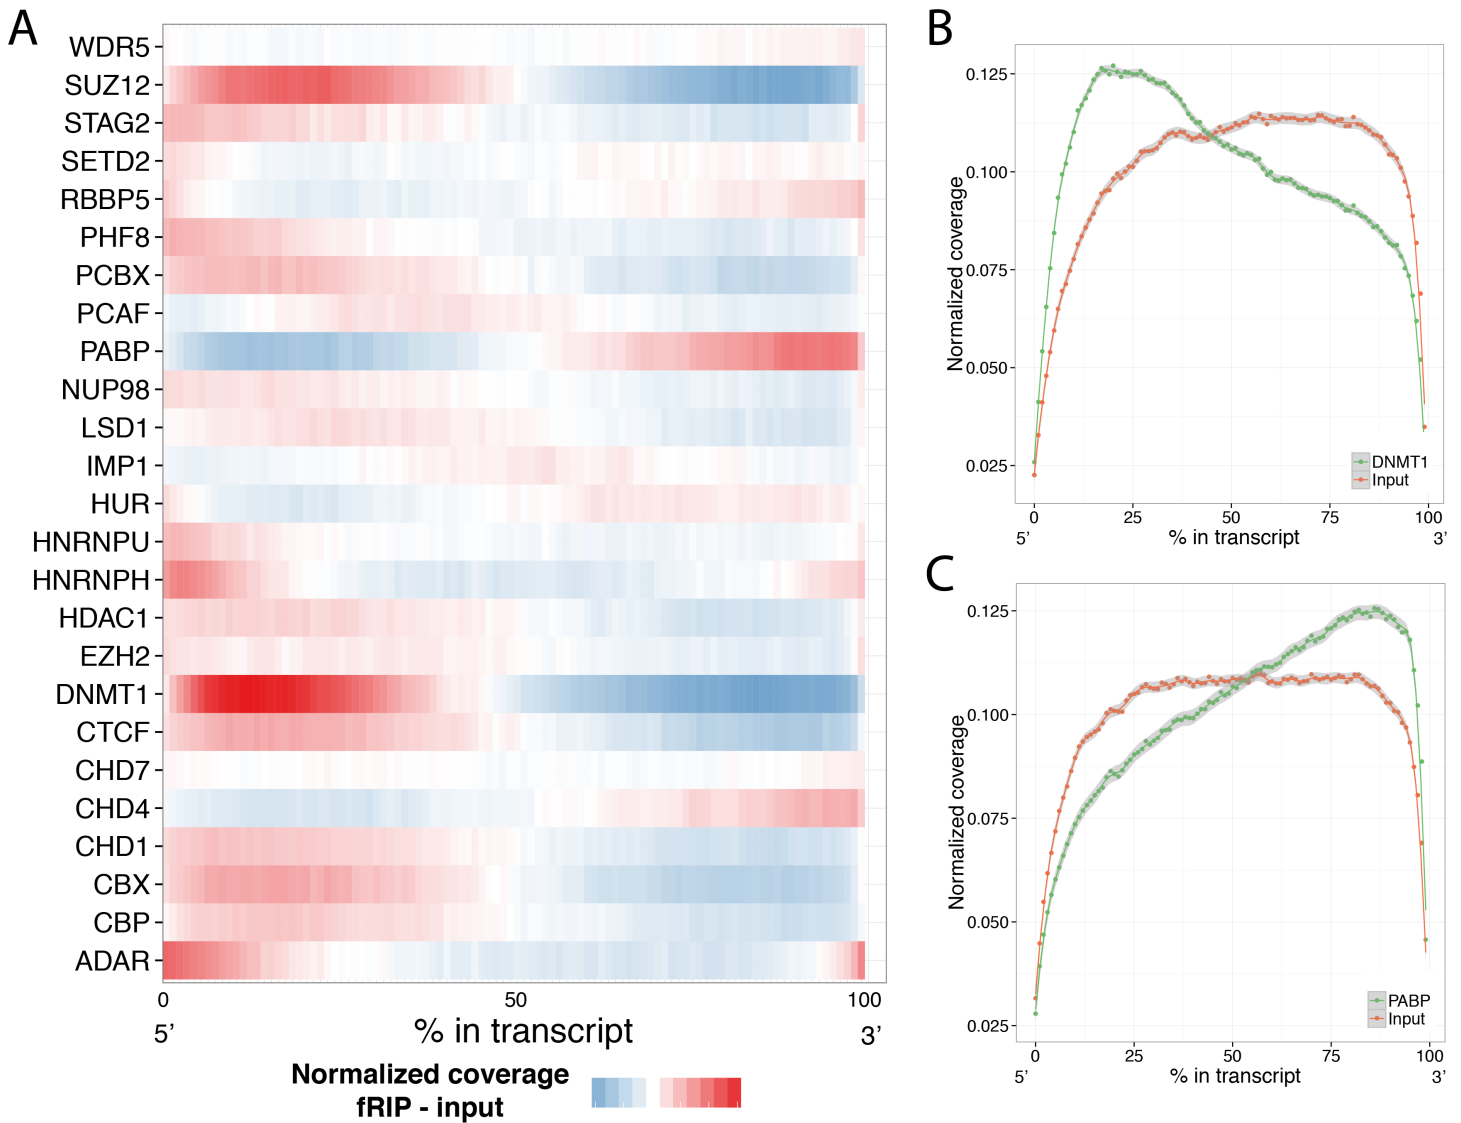

**Figure S7: fRIP-Seq coverage displays light positional biases.**

Though fRIP-Seq does not provide binding site resolution, read coverage for some experiments trended towards one end of the transcript. We computed alignment coverage in 100 uniformly-sized bins for each gene for both the fRIP-Seq and input sequencing for every protein. After normalizing bin coverages to sum to one, we plotted the values in (B,C) and the difference between fRIP and input as a heat map (A). Reflecting known biology, PABP binds 3' transcript ends. DNMT1 and SUZ12 tended towards 5' ends.

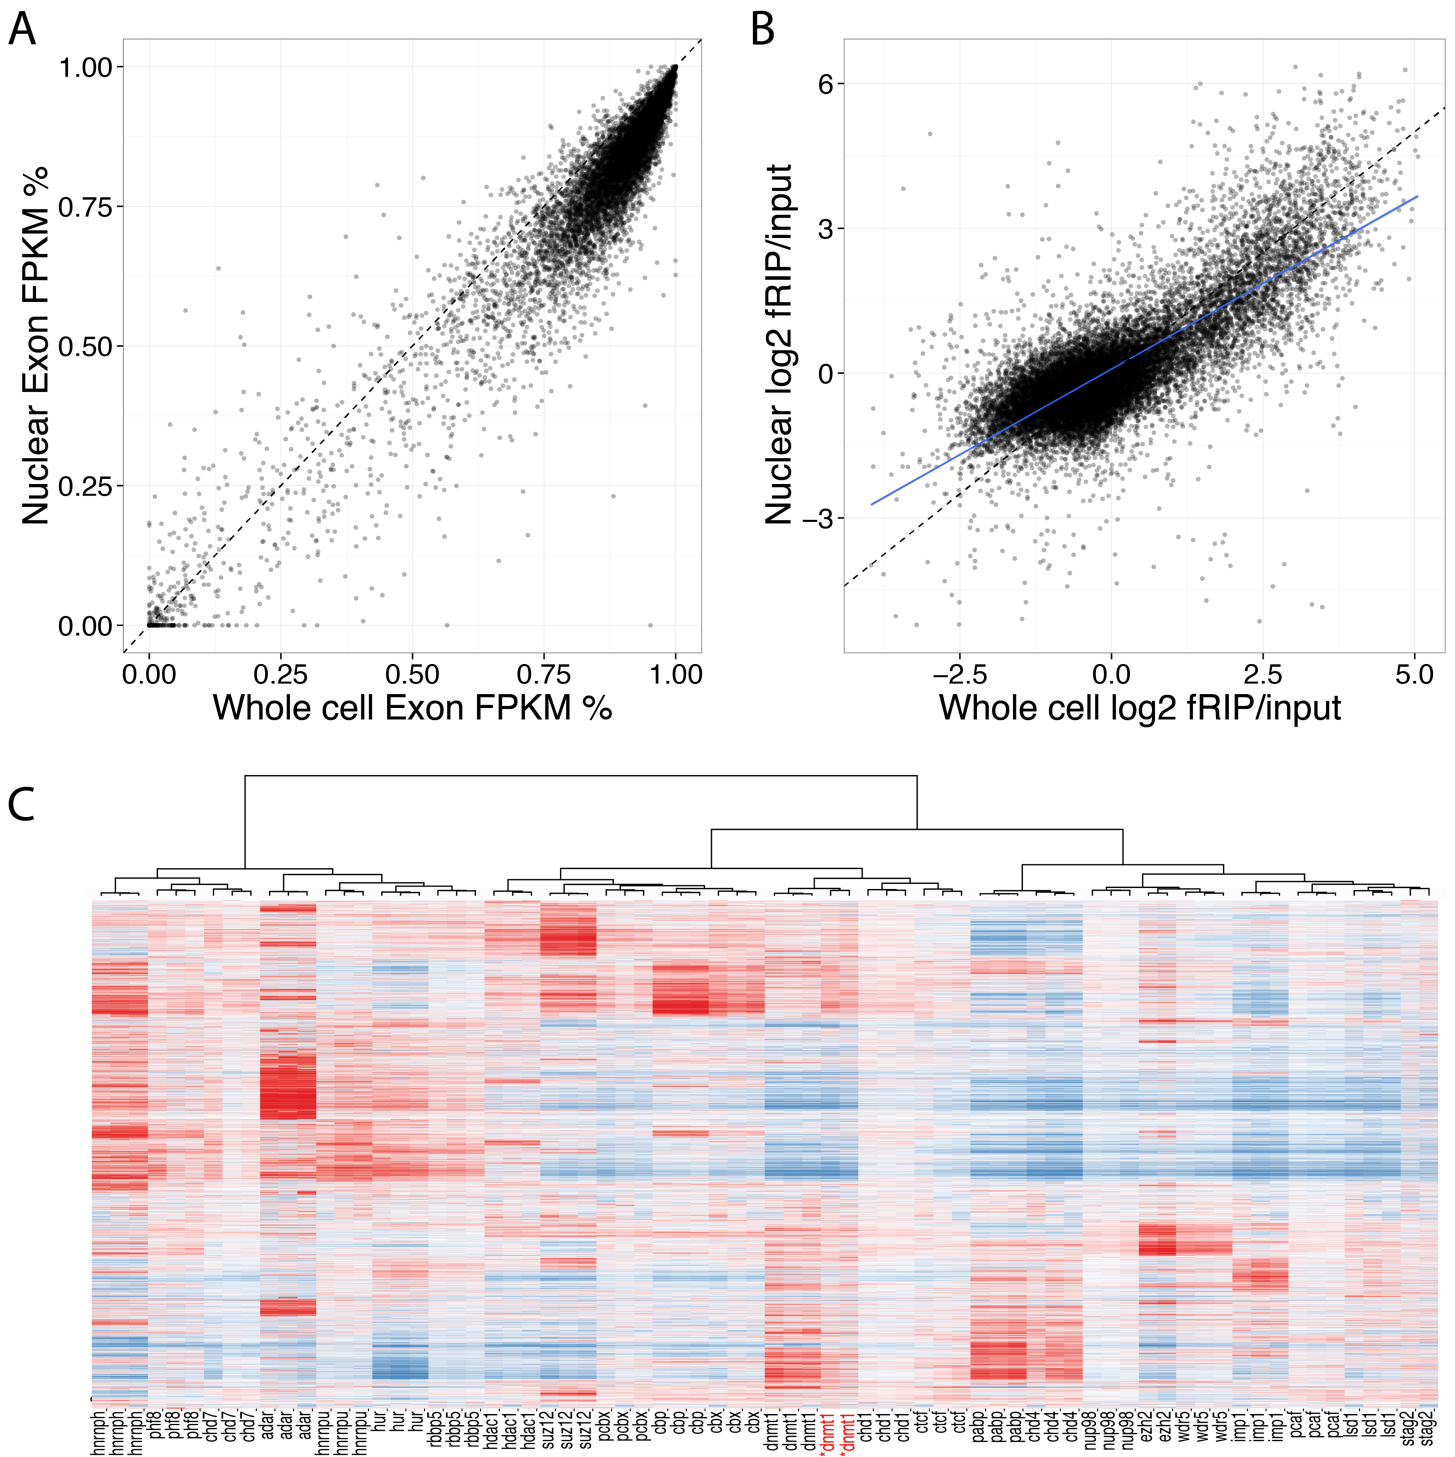

**Figure S8: Nuclear fRIP-Seq matches whole cell fRIP-Seq.**

(A) We computed the proportion of a genes' FPKM assigned to exon isoforms versus unspliced pre-RNA isoforms (Methods) in whole cell input and nuclear fraction input. As expected, transcripts in the nuclear fraction tended to be slightly less spliced. However, the nuclear fraction still contained primarily spliced transcripts, suggesting that fRIP-mapped interactions with mature spliced transcripts regularly occur in the nucleus. (B) fRIP-Seq log<sub>2</sub> fold changes for DNMT1 in a nuclear fraction versus whole cell match well, suggesting that whole cell interactions are primarily nuclear. (C) Further

supporting their concordance, whole cell (black font) and nuclear (red font with asterisk) DNMT1 fRIP-Seq replicates cluster together relative to all other fRIPs performed in a hierarchical clustering of log<sub>2</sub> fold changes for the ~25,000 genes present in at least one condition.

**A**

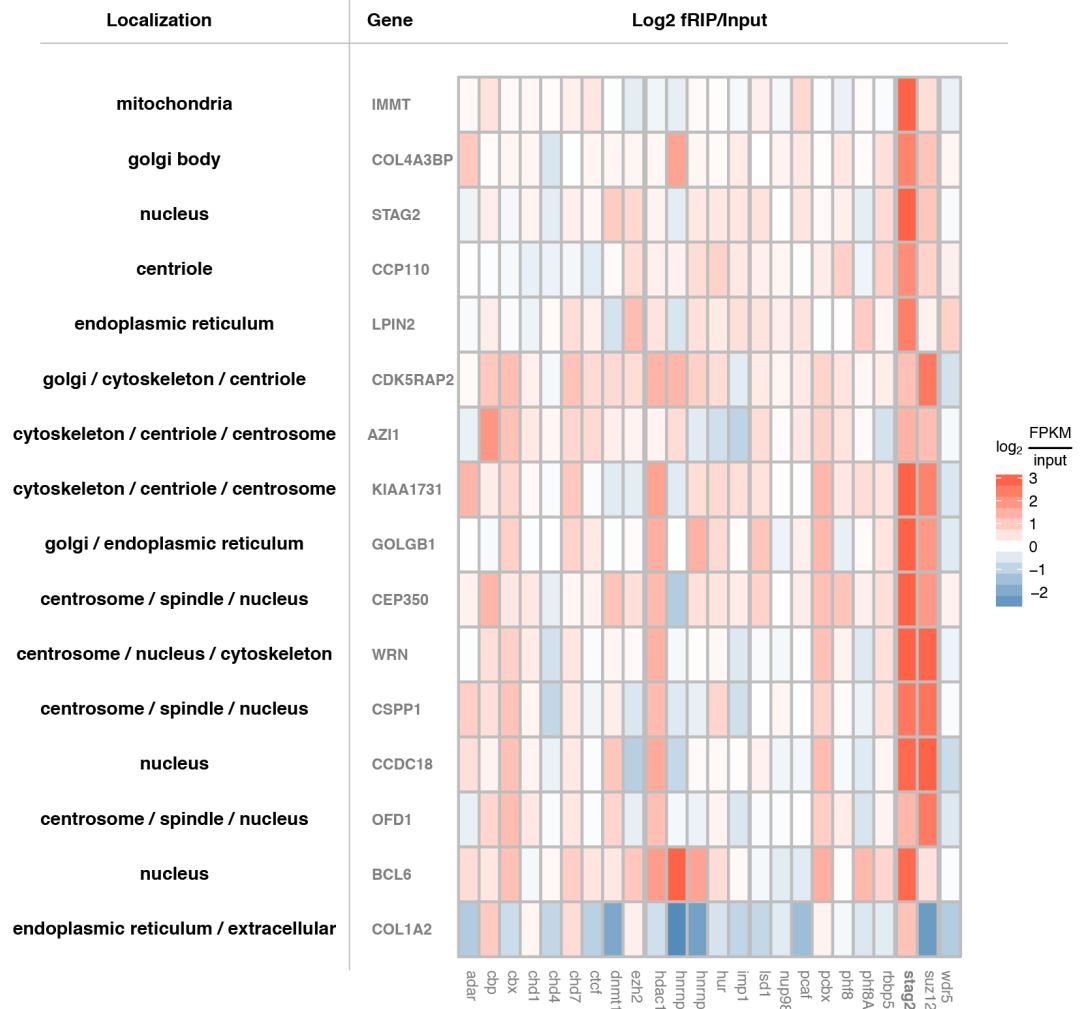

**B**

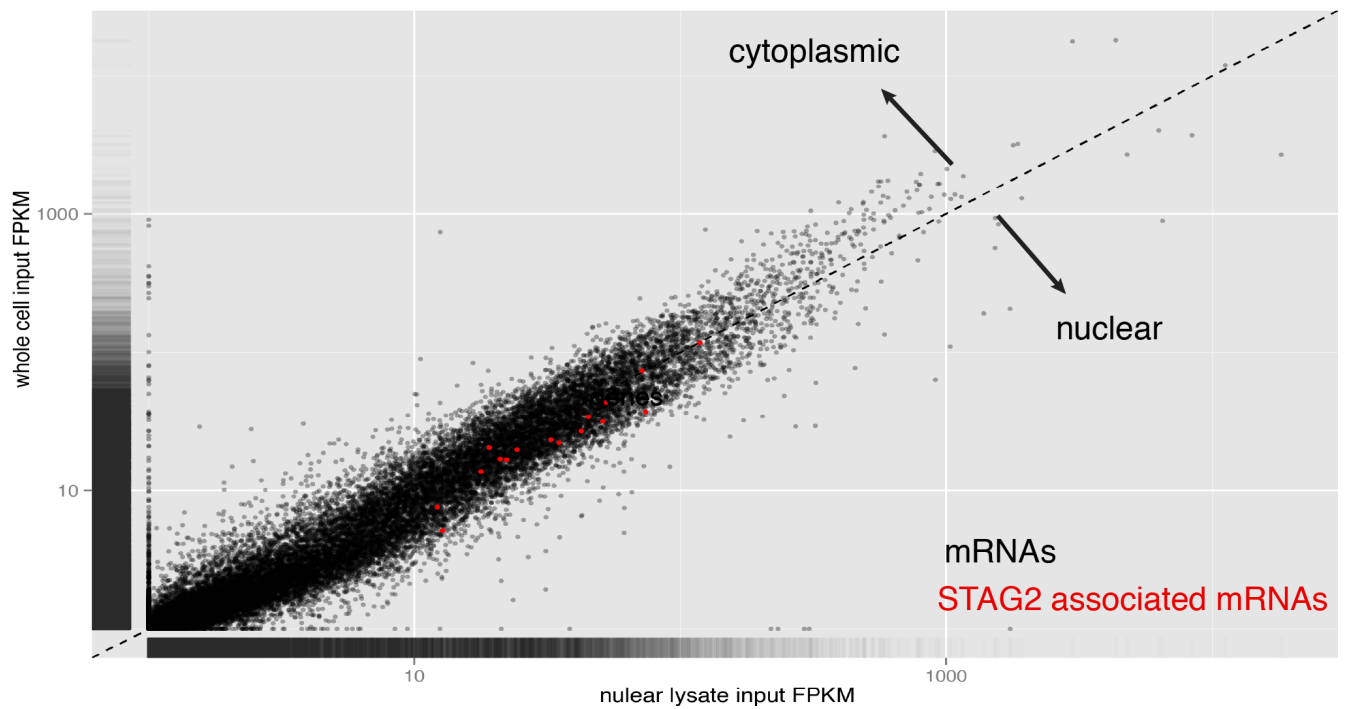

**Figure S9: The cohesin subunit STAG2 specifically binds a small cohort of transcripts encoding centrosome-localized proteins.**

(A) Heat map of log<sub>2</sub> fRIP/input for transcripts significantly enriched in STAG2 fRIP-Seq experiments. The variable fold changes of the other proteins for these genes precludes the possibility of a protocol bias towards the set. Subcellular localizations obtained from the COMPARTMENTS database (Binder et al. 2014) indicate that STAG2-bound transcripts encode for proteins that localize to centrosomes, centrioles, spindles, and membrane bound organelles, in line with known functional roles of STAG2. (B) STAG2 enrichment does not appear to be driven by STAG2 protein nuclear localization. In a scatter plot of gene abundance (FPKM) generated by RNA-Seq from nuclear lysate (x-axis) versus whole cell lysate (y-axis) in K562 cells, STAG2-enriched transcripts (in red) lack a bias towards one or the other.

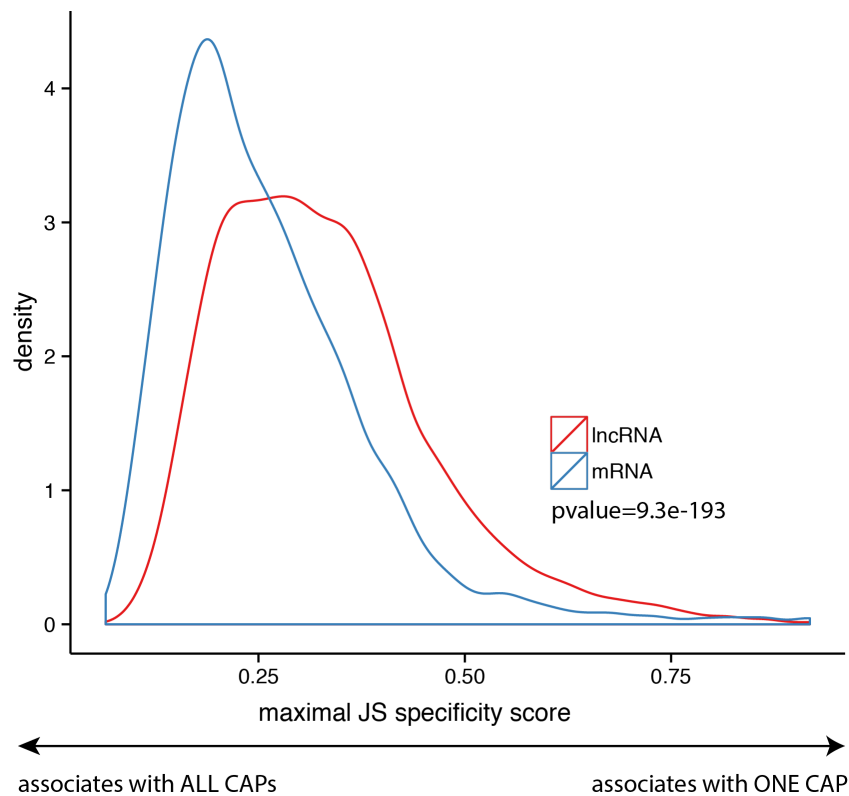

**Figure S10: IncRNA association with CAPs is more specific than CAP association with mRNAs.**

Both mRNAs and IncRNAs associate with CAPs, but IncRNAs associate with fewer CAPs on average. We plotted the distributions of maximal CAP specificity scores calculated for an abundance-matched set of mRNAs (blue) and IncRNAs (red). The specificity distribution for IncRNAs was higher than for mRNAs using the Wilcoxon rank sum test ( $p$ -value  $< 9.3e-193$ ).



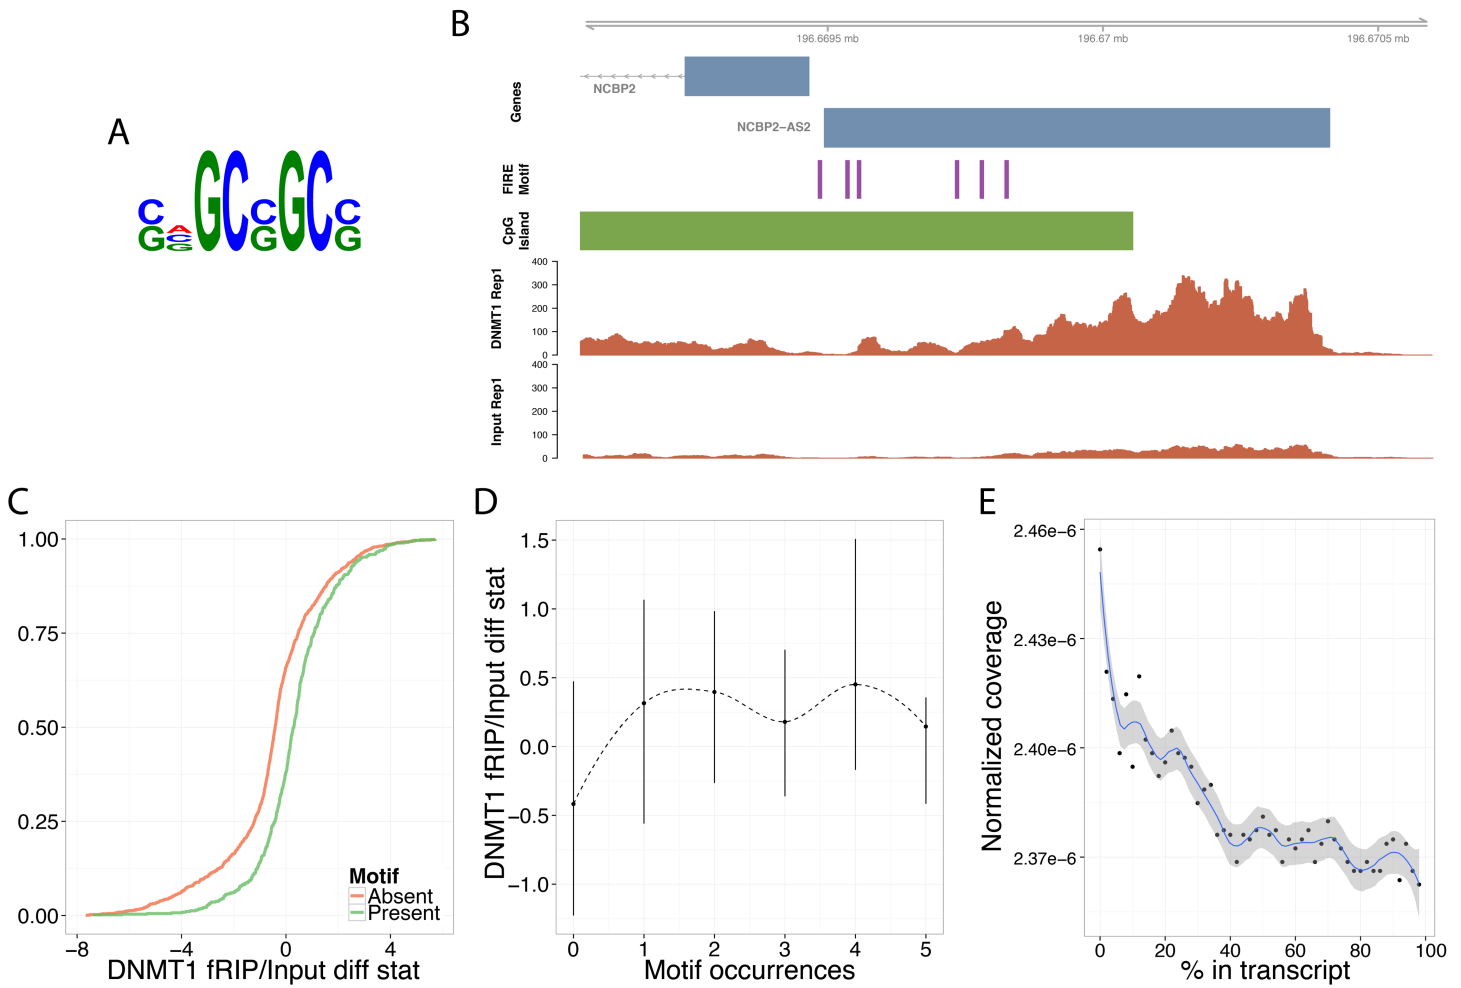

**Figure S11: DNMT1 binds a GC-rich motif in lncRNAs.**

(A) We discovered an 8 nt GC-rich motif that had high mutual information with the DNMT1 fRIP/input differential expression statistic for lncRNAs. (B) For example, the motif occurs multiple times in a lncRNA antisense of the mRNA NCBP2, overlapping the CpG island of its promoter. (C) Empirical cumulative distribution functions of the DNMT1 fRIP/input differential expression statistic, separated by lncRNAs with and without the motif, demonstrate its strong effect. (D) The 25th, 50th, and 75th quantiles of the statistic distribution for transcripts with the specified numbers of motifs indicate that presence/absence is sufficient to explain the motif's effect. (E) As exemplified by the motif instances in NCBP2-AS2, coverage of the motif is enriched at the 5' ends of transcripts. We normalized motif coverage counts by the number of transcripts.

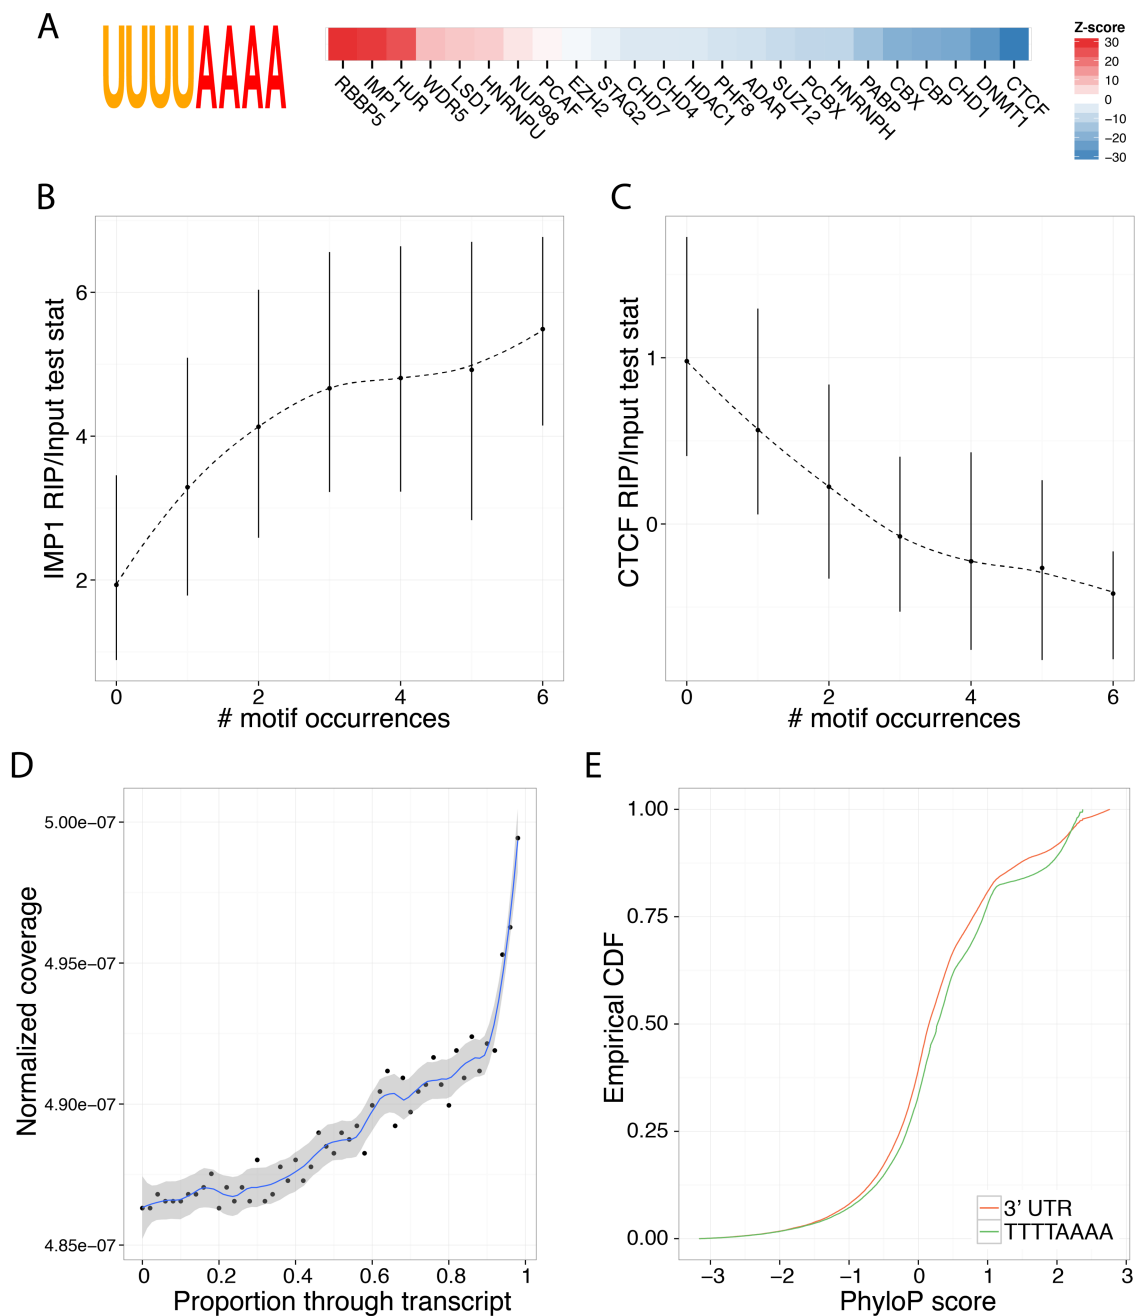

**Figure S12: UUUUAAAA is a polarizing, conserved, 3' motif.**

(A) The RBPs responded strongly to the motif UUUUAAAA and slight variations of it, shown as the Mann-Whitney U test Z-score comparing Cuffdiff differential expression statistics for genes with and without the motif. Among the strongest effects were (B) IMP1's preference for and (C) CTCF's avoidance of transcripts containing the motif, shown here as the 25th, 50th, and 75th percentile of the fRIP/input statistic distributions for transcripts with 0-6 motif occurrences. (D) The motif tended to occur towards the 3' ends of transcripts, shown here as the average coverage over transcripts, each divided individually into 50 equally sized bins. (E) The distribution of PhyloP scores for motif occurrences in 3' UTRs was shifted towards greater scores relative to all 3' UTR nucleotides.

**A**

regression  
coefficient

-20 0 20

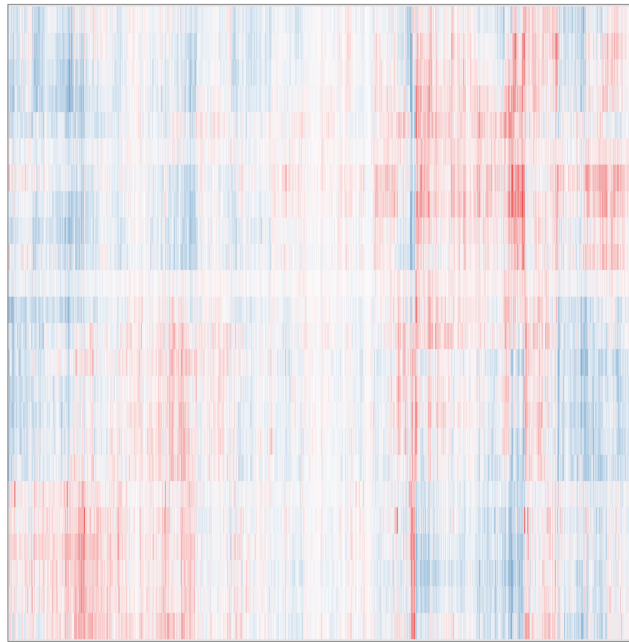

7-mers

**B**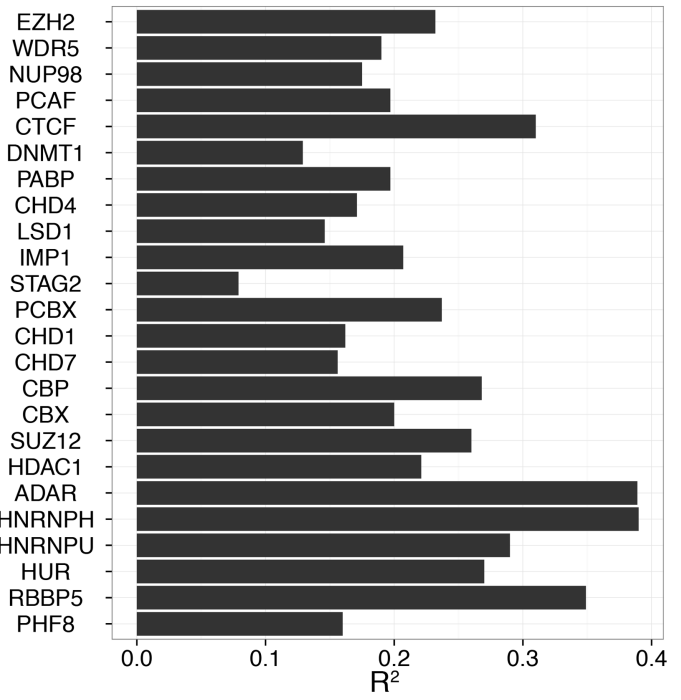R<sup>2</sup>**C**

HNRNPH1

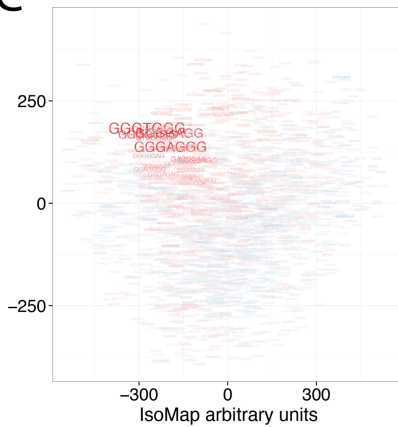**D**

HUR

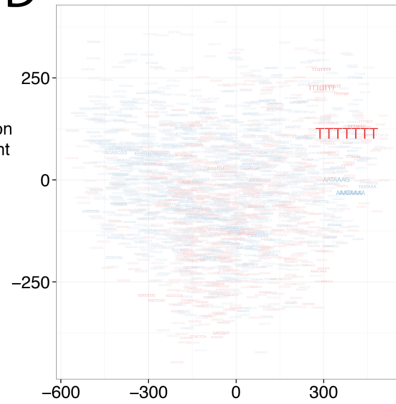**E**

PABP

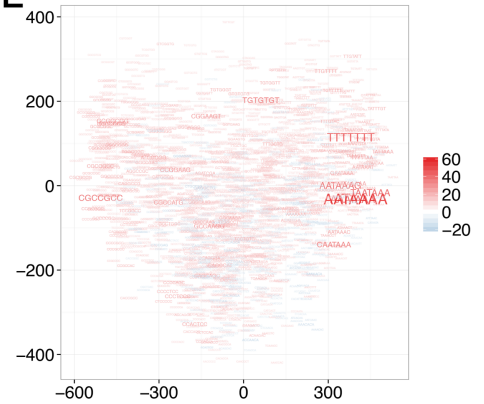**F**

CTCF

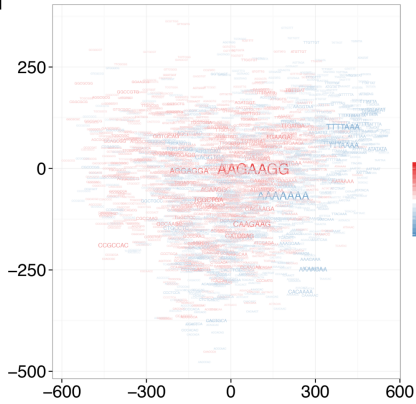**G**

SUZ12

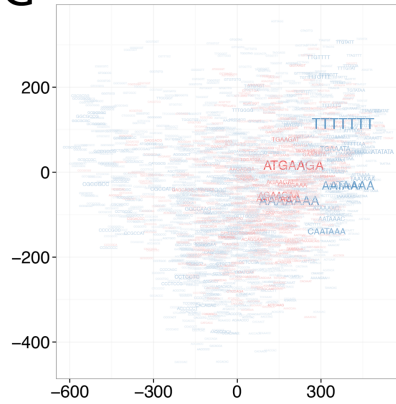**H**

WDR5

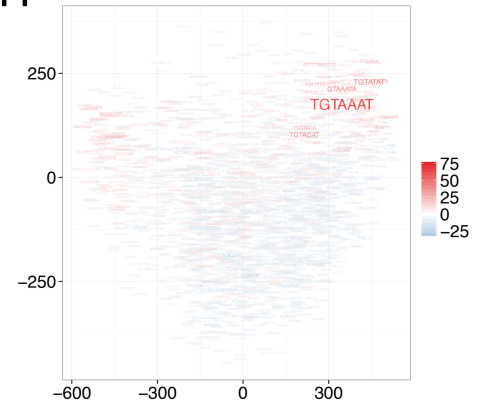

### Figure S13: K-mers predict RNA binding preferences.

We fit a linear regression model, in which every 7-mer was assigned a coefficient that was optimized to best predict a transcript's fRIP/input fold change from its 7-mer counts vector. (A) Clustering all proteins by these coefficient vectors displayed the relationships between their binding preferences. (B) On the right, the  $R^2$  values (proportion of variance explained by the model) indicate the extent to which a 7-mer based model can predict binding for each protein. The greatest accuracies were achieved for ADAR, which focused on Alu 7-mers, and HNRNPH1, which focused on G-rich 7-mers. To better visualize the most important 7-mers weighted by the model, we plotted the coefficients on a 2D surface with related 7-mers nearby. The placement of 7-mers on the 2D surface was computed by a nonparametric dimension reduction approach called IsoMap on the co-occurrence vectors of the 7-mers. In doing so, we can see the importance of (C) G-rich 7-mers to the HNRNPH1 model, (D) U-rich 7-mers to the HUR model, and (E) 7-mers containing the polyadenylation signal AAUAAA for PABP. Among CAPs with less studied sequencing composition preferences, we see AG-rich 7-mers, but not AU-rich 7-mers for (F) CTCF and (G) SUZ12, (H) UGUAAAU and related 7-mers for WDR5.

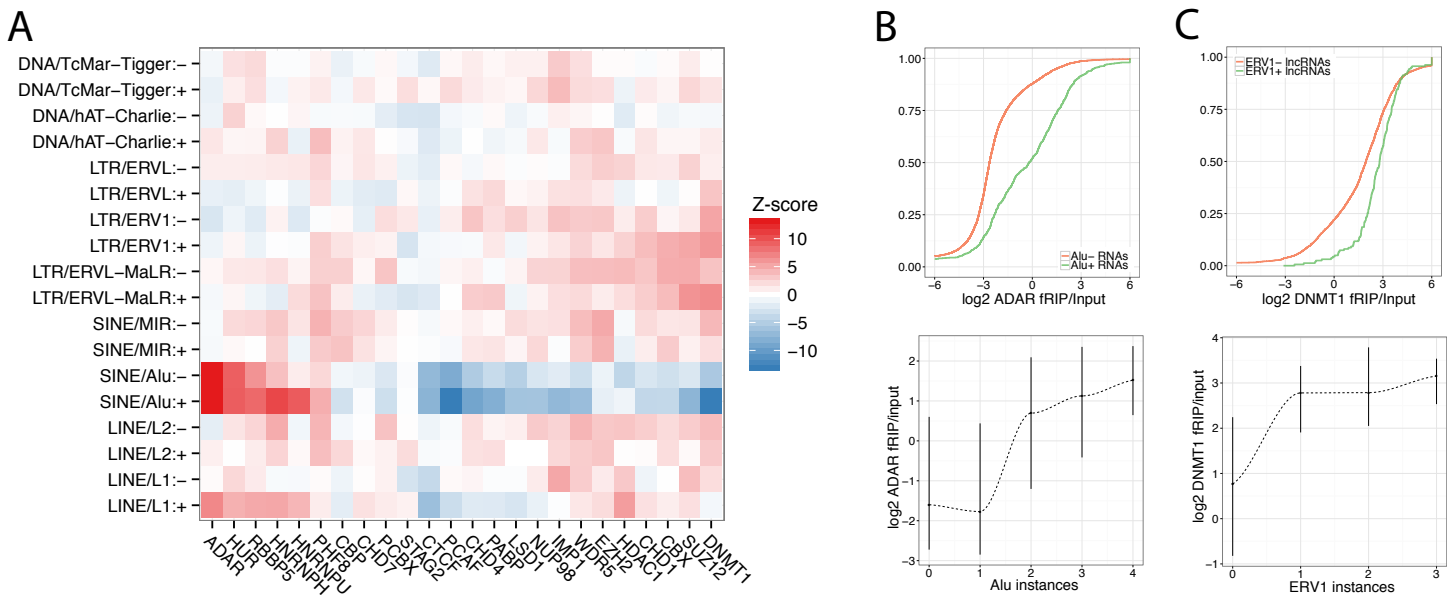

### Figure S14: Transposable elements correlate with RNA binding.

(A) Mann-Whitney U test Z-scores comparing fRIP/input fold changes for transcripts with and without specific transposable element (TE) families revealed many significant associations. Only the most expressed transcript of every gene was considered. (B) Empirical cumulative distribution functions of RNAs with and without Alu elements demonstrate the strong role of Alu in determining ADAR binding. Below, the 25th, 50th, and 75th percentiles of the fRIP/input distribution indicate that binding increases with two or more Alu's, reflecting a known preference for ADAR to bind double-stranded Alu sequences folded on themselves. (C) A DNMT1 preference for sense-strand ERVs was apparent for all RNAs, but primarily limited to lncRNAs.

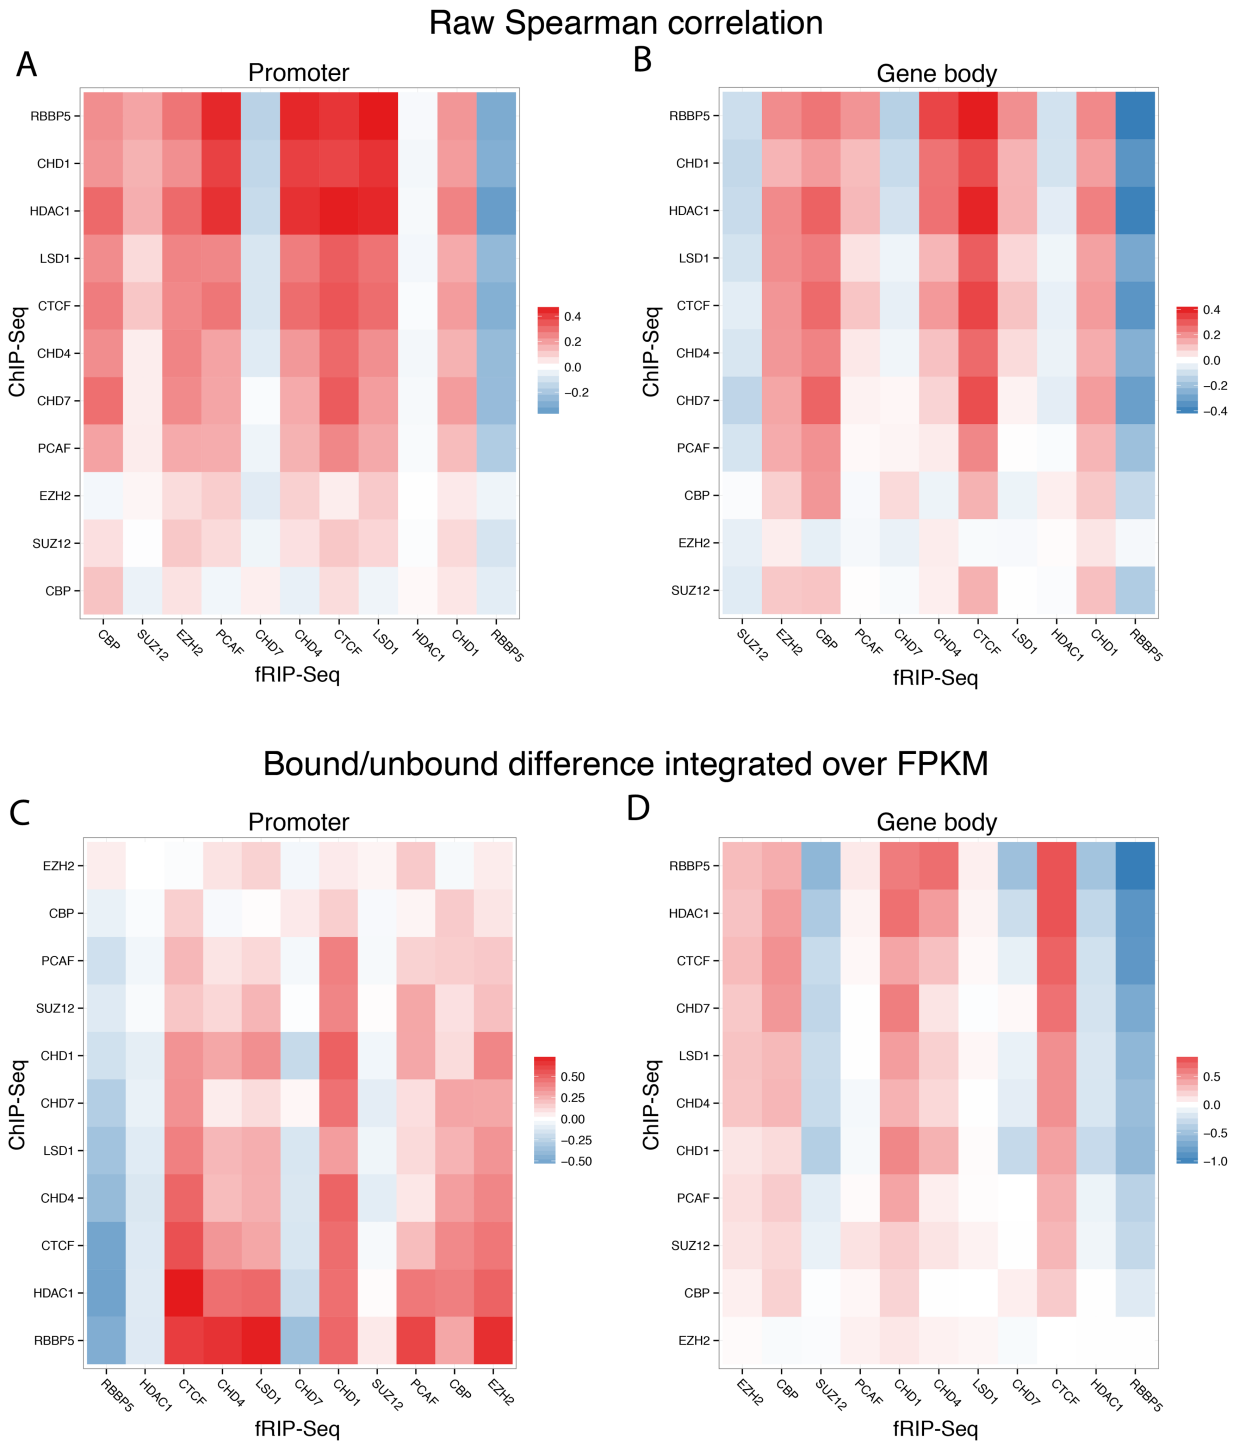

**Figure S15: Proteins with both fRIP and ChIP suggest a weak relationship.**

Over all genes, we computed the Spearman correlation between fRIP-Seq/input and ChIP/input for all shared proteins in the (A) promoter and (B) gene body. Because both fRIP-Seq/input and ChIP-Seq/input correlate with FPKM, these correlations are FPKM-driven and challenging to interpret. Thus, we also plotted a statistic measuring the difference in ChIP-Seq/input across FPKM levels between bound and unbound RNAs (Methods) for the (C) promoter and (D) gene body. In both views, a relationship between fRIP-Seq and ChIP-Seq is not apparent, suggesting that factors other than DNA occupancy are more important to RNA binding.

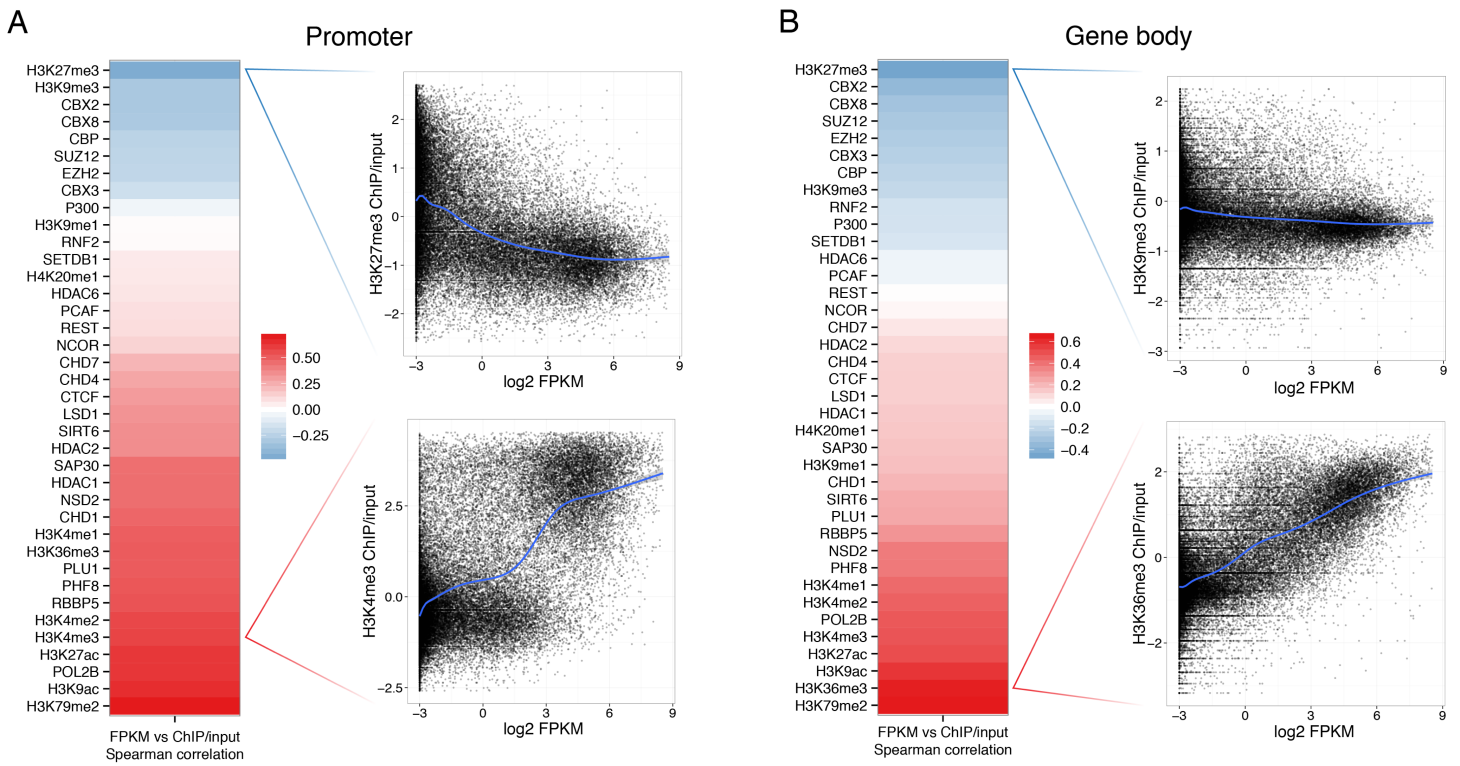

**Figure S16: Chromatin marks correlate with gene abundance.**

Over all genes, we computed the Spearman correlation between input FPKM and ChIP-Seq/input in the (A) promoter and (B) gene body, revealing known correlations between chromatin marks and gene abundance.

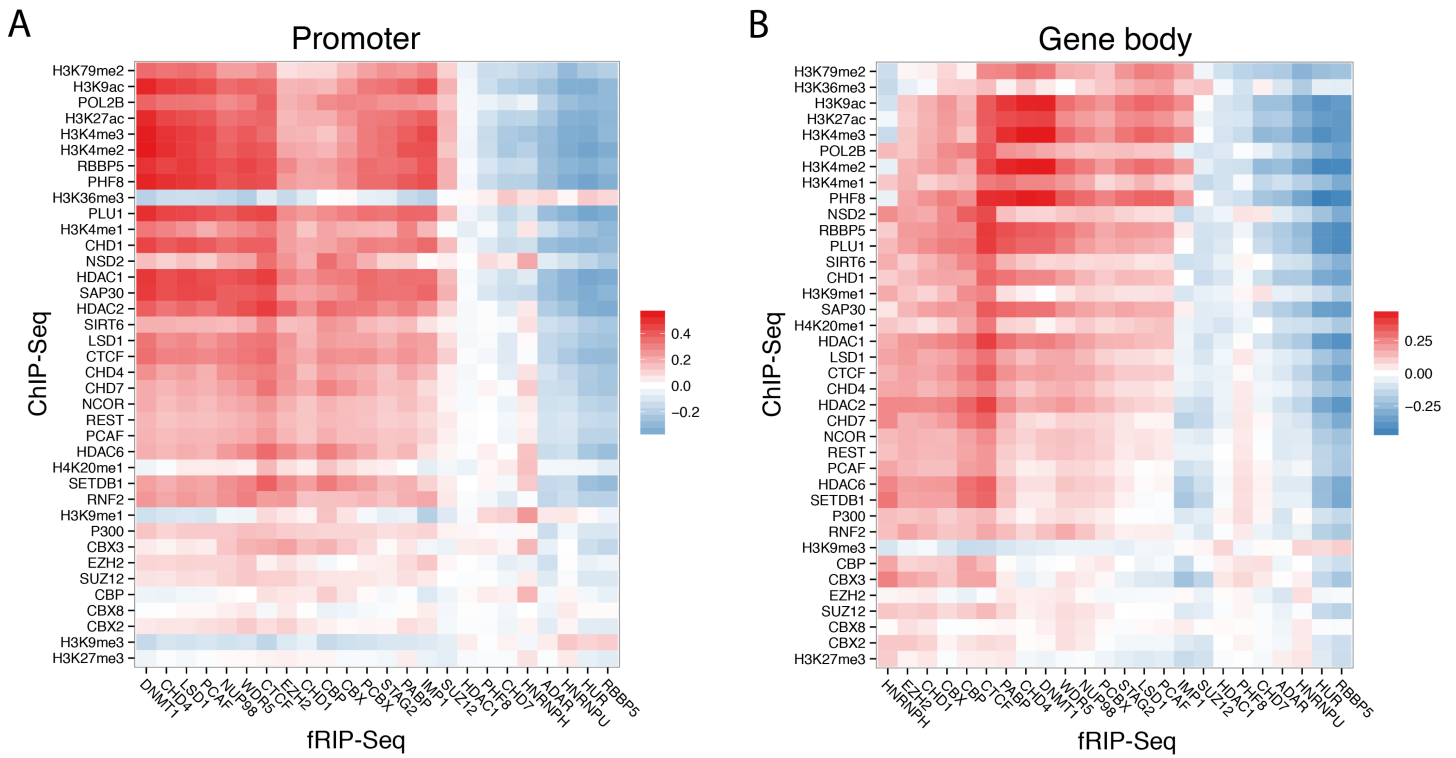

**Figure S17: fRIP versus chromatin mark correlations are FPKM-driven.**

Over all genes, we computed the Spearman correlation between each fRIP-Seq/input and each ChIP-Seq/input in the (A) promoter and (B) gene body. Because both fRIP-Seq/input and ChIP-Seq/input correlate with FPKM, these correlations are FPKM-driven and challenging to interpret.

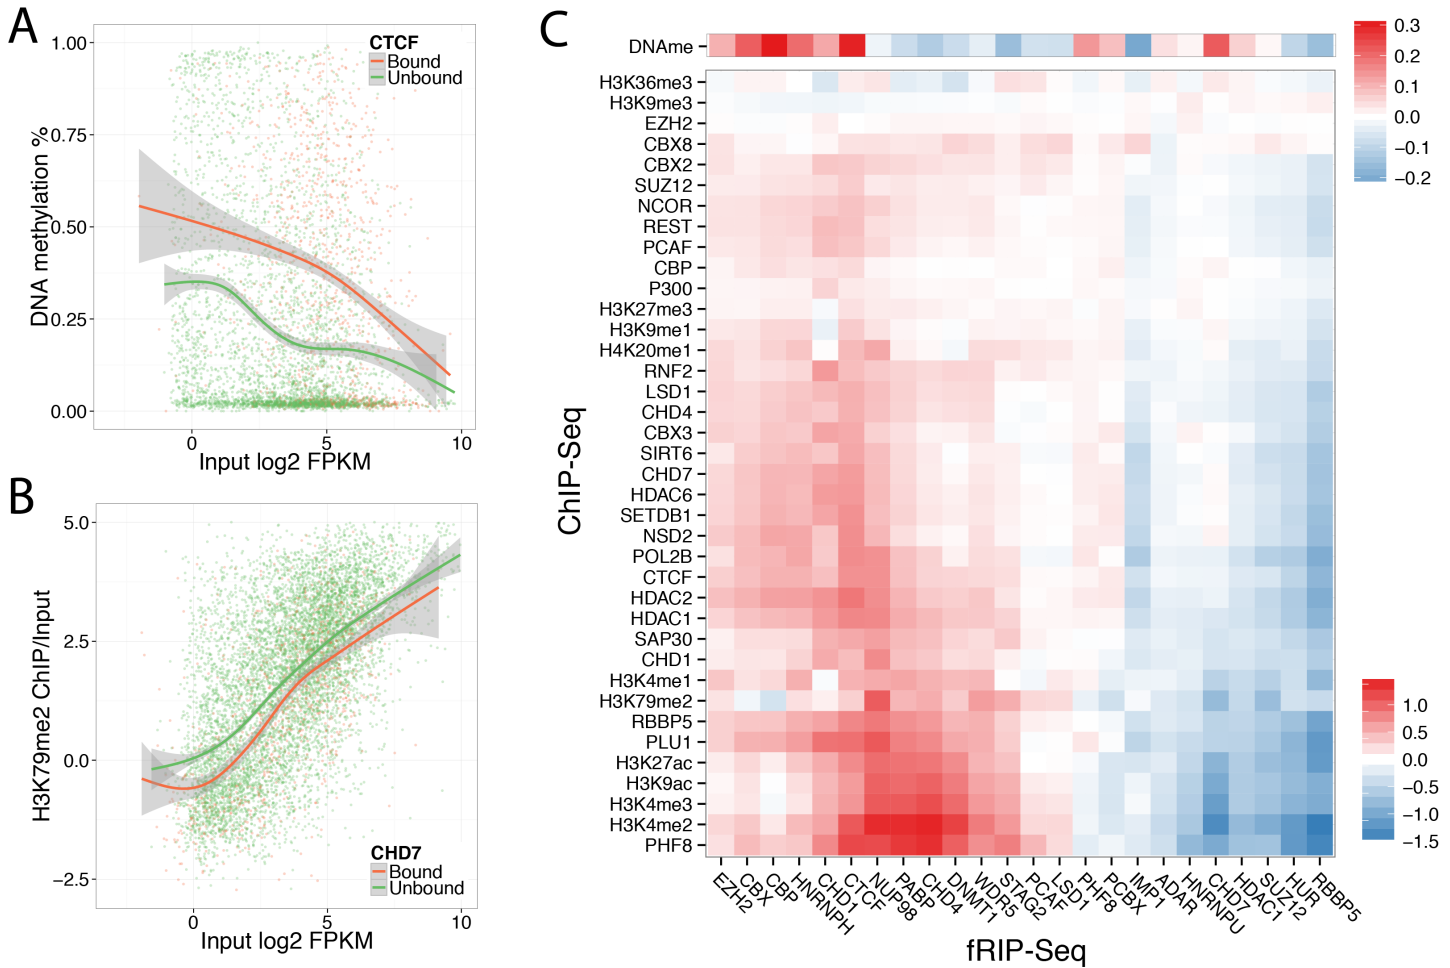

**Figure S18: Protein binding to RNA relates to local chromatin over the gene body.**

Because chromatin marks measured by RRBS (DNA methylation) or ChIP-Seq (histone modifications and modifiers) correlate with gene abundance (Figure 6 - figure supplement 2), we plotted this relationship separately for genes bound and unbound by each protein. (A) CTCF-bound RNAs have more DNA methylation over the span of the gene body, shown as a scatter plot of every gene with a generalized additive model regression. (B) CHD7-bound RNAs have less H3K79me2 in over the gene body. (C) For each chromatin mark and protein, we computed the difference between the bound and unbound regression lines and plotted as a heat map (Methods), revealing a clear difference in the relationship of certain proteins to activating chromatin marks.
